# Supplementary material for: Optimizing Polymer Solar Cells Using Non-Halogenated Solvent Blends
Source: MDPI journal article supplement (doi:10.3390/polym11030544), 2019-03-22
Supplement: s1 [file s1]

# Supplementary Information

## Optimizing polymer solar cells using non-halogenated solvent blends

Guler Kocak<sup>1</sup>, Desta Gedefaw<sup>1,2</sup>, and Mats R. Andersson<sup>1,\*</sup>

<sup>1</sup> Flinders Institute for Nanoscale Science and Technology, Flinders University, Sturt Road, Bedford Park, Adelaide, SA 5042, Australia

<sup>2</sup> School of Biological and Chemical Sciences, The University of South Pacific, Laucala Campus, Suva, Fiji

\* Correspondence: mats.andersson@flinders.edu.au; Tel.: +61-8-82013585

**Table S1:** The integrated currents from EQE compared to the Jsc from I-V measurement of corresponding devices.

| Solvent           | Integrated Jsc from EQE (mA/cm <sup>2</sup> ) | Jsc (mA/cm <sup>2</sup> ) |
|-------------------|-----------------------------------------------|---------------------------|
| o-xylene          | 2.2                                           | 2.3                       |
| o-xylene + 2% MN  | 9.7                                           | 9.9                       |
| o-xylene + 3% PN  | 9.9                                           | 10.4                      |
| o-xylene + 3% DIO | 8.2                                           | 8.9                       |
| o-xylene + 2% CN  | 5.9                                           | 6.4                       |
